# Supplementary material for: Europium Ion-Based Magnetic-Trapping and Fluorescence-Sensing Method for Detection of Pathogenic Bacteria
Source: PubMed Central journal article supplement (PMC11007678; doi:10.1021/acs.analchem.4c00655), 2024-03-25
Supplement: ac4c00655_si_001.pdf [file ac4c00655_si_001.pdf]

## Supporting Information

### Europium Ion-based Magnetic Trapping and Fluorescence-sensing Method for Detection of Pathogenic Bacteria

Miftakhul Jannatin,<sup>1</sup> Tzu-Ling Yang,<sup>1</sup> Yi-Yuan Su,<sup>2</sup> Ru-Tsun Mai,<sup>2</sup> Yu-Chie Chen<sup>1,3\*</sup>

<sup>1</sup>Department of Applied Chemistry, National Yang Ming Chiao Tung University, Hsinchu  
300, Taiwan

<sup>2</sup>Department of Biological Science and Technology, National Yang Ming Chiao Tung  
University, Hsinchu 300, Taiwan

<sup>3</sup>International College of Semiconductor Technology, National Yang Ming Chiao Tung  
University, Hsinchu 300, Taiwan

\*Corresponding author

[yuchie@nycu.edu.tw](mailto:yuchie@nycu.edu.tw)

### Table of Contents

|                                                                                                           |     |
|-----------------------------------------------------------------------------------------------------------|-----|
| <b>Additional experimental details</b> .....                                                              | S2  |
| <b>Table S1.</b> Conversion of OD <sub>600</sub> of 1 with the weight and CFU per mL .....                | S3  |
| <b>Table S2.</b> Examination of the accuracy and precision of the developed method .....                  | S3  |
| <b>Table S3.</b> List of comparisons between existing methods and our work.....                           | S4  |
| <b>Figure S1.</b> Examination of the magnetic Eu <sup>3+</sup> -bacterium conjugates.....                 | S6  |
| <b>Figure S2.</b> SEM images of <i>S. aureus</i> .....                                                    | S6  |
| <b>Figure S3.</b> Examination of the optimal pH .....                                                     | S7  |
| <b>Figure S4.</b> Optimization of the concentration of the added bleach .....                             | S7  |
| <b>Figure S5.</b> Examination of incubation conditions .....                                              | S8  |
| <b>Figure S6.</b> Examination of different model bacteria .....                                           | S9  |
| <b>Figure S7.</b> Examination of the optimal binding pH of Eu <sup>3+</sup> toward <i>S. aureus</i> ..... | S9  |
| <b>Figure S8.</b> Examination of the optimal incubation parameters .....                                  | S10 |
| <b>Figure S9.</b> Quantitative analysis .....                                                             | S10 |
| <b>Figure S10.</b> Calibration curve .....                                                                | S11 |
| <b>Figure S11.</b> Examination of interference effects .....                                              | S12 |
| <b>Figure S12.</b> Examination of precision and accuracy.....                                             | S13 |
| <b>Figure S13.</b> Characterization of fungal spores by MALDI-MS .....                                    | S13 |
| <b>Figure S14.</b> Examination of our method for detection of other microorganisms .....                  | S14 |

## **Additional Experimental Details**

### **Preparation of fungal spores**

*Aspergillus niger* (BCRC30130) was purchased from the Bioresource Collection and Research Center (Hsinchu, Taiwan) and grew in potato dextrose agar (HiMedia, Mumbai, India) at 28 °C for 7 days. The spores were collected by depositing with Tris buffer on the agar plate followed by picking up using a pipette.

### **Preparation of lentiviruses**

Human embryonic kidney (HEK) 293 FT cells were grown in DMEM (#SH30003.02, Cytiva, Marlborough, MA, USA) supplemented with 10% heat-inactivated fetal bovine serum (#SH30396.13, Gibco, Grand Island, NY, USA), L-glutamine, nonessential amino acids (#CC517-0100, GeneDirectX, Taoyuan, Taiwan), and penicillin/streptomycin (#SV30010, Cytiva) in a humidified incubator (Forma 301, Thermo Fisher Scientific, Marietta, OH, USA) at 37°C under 5% CO<sub>2</sub>. The plasmids pLKO.1-puro-based shLuc (TRCN0000072246), pCMV-ΔR8.74psPAX2 (expressing *pol*, *gag*, and *rev*), and pMD2.G (expressing vesicular stomatitis virus glycoprotein) were purchased from the RNAi Core Facility, Academia Sinica, Taiwan. For lentivirus production, HEK293FT cells were transfected with the plasmids described above using Lipofectamine 2000 transfection reagent (Invitrogen, Karlsruhe, Germany) according to the protocol suggested by the RNAi Core Facility (<http://rna.genmed.sinica.edu.tw/webContent/web/protocols>).

### **Using Eu<sup>3+</sup> as the magnetic trapping and sensing probes for other microorganisms**

The trapping and sensing steps using Eu<sup>3+</sup> as the probe were performed consistent with the description provided in the main text. However, in the case of magnetic aggregated fungal spores, 1.2% bleach (10 μL) was introduced instead of 0.25% bleach (10 μL). This was done because spores are inherently more resistant to dissolution than bacteria and viruses.

**Table S1.** Conversion of OD<sub>600</sub> of 1 with the concentration and CFU mL<sup>-1</sup> (n= 4)

| Bacteria at OD <sub>600</sub> of 1 | weight (mg mL <sup>-1</sup> ) | CFU mL <sup>-1</sup>  |
|------------------------------------|-------------------------------|-----------------------|
| <i>S. aureus</i>                   | 0.50±0.04                     | ~3.93×10 <sup>9</sup> |
| <i>B. cereus</i>                   | 0.31±0.02                     | ~3.76×10 <sup>9</sup> |
| <i>E. faecalis</i>                 | 0.48±0.05                     | ~1.19×10 <sup>8</sup> |
| <i>E. coli</i> J96                 | 0.39±0.03                     | ~1.75×10 <sup>9</sup> |
| <i>A. baumannii</i> M3237          | 0.57±0.03                     | ~3.97×10 <sup>8</sup> |
| <i>P. aeruginosa</i>               | 0.69±0.06                     | ~2.07×10 <sup>9</sup> |

**Table S2.** Evaluation of the accuracy and the precision of the developed method.

|                  | Day 1 | Day 2 | Day 3 | Day 4    | Day 5 |
|------------------|-------|-------|-------|----------|-------|
| Morning          | 175.9 | 165.9 | 147.9 | 123.8    | 177.0 |
|                  | 179.1 | 142.6 | 130.2 | 150.7    | 127.2 |
|                  | 174.7 | 137.6 | 127.1 | 161.2    | 127.3 |
| Afternoon        | 164.1 | 167.3 | 142.2 | 164.2    | 127.5 |
|                  | 127.2 | 159.4 | 140.1 | 158.9    | 126.5 |
|                  | 174.7 | 152.6 | 160.2 | 153.3    | 173.5 |
| Mean             | 165.9 | 154.2 | 141.3 | 152.0    | 143.2 |
| % RSD            | 11.8  | 7.9   | 8.5   | 9.7      | 17.4  |
| Mean= 151.3±18.5 |       |       |       |          |       |
|                  |       | RSD%  | 12.2% | Accuracy | 99.1% |

**Table S3.** List of comparisons between existing methods and our work.

| Fluorescence sensing probes <sup>a</sup>                          | Target bacteria                                                                                   | Time for synthesis of the probes | Semi-log plot: Y vs. log X | LOD (CFU mL <sup>-1</sup> ) | Analysis time | Magnetic enrichment | Ref |
|-------------------------------------------------------------------|---------------------------------------------------------------------------------------------------|----------------------------------|----------------------------|-----------------------------|---------------|---------------------|-----|
| Au NCs and Ru( <i>bpy</i> ) <sub>3</sub> <sup>2+</sup>            | <i>Staphylococcus aureus</i>                                                                      | 50 min                           | Yes                        | 1.0                         | 30 min        | No                  | 1   |
| Apt-Van-QDs                                                       | <i>S. aureus</i>                                                                                  | > 8 h                            | Yes                        | 1                           | 30 min        | No                  | 2   |
| NCND/GO/apt-o-CD                                                  | <i>Acinetobacter baumannii</i>                                                                    | >88 h                            | Yes                        | 100                         | 20 min        | No                  | 3   |
| Bi <sub>2</sub> S <sub>3</sub> @MNO <sub>2</sub> @Vancomycin      | <i>S. aureus</i>                                                                                  | >18 h                            | Yes                        | 6                           | 10 min        | No                  | 4   |
| BCD@SiO <sub>2</sub> @BSA-AuNC                                    | <i>Escherichia coli</i> ,<br><i>Pseudomonas aeruginosa</i> , and<br><i>Salmonella typhimurium</i> | >75 h                            | Yes                        | 150,<br>112,<br>792         | >1.5 h        | No                  | 5   |
| biocompatible CsPbBr <sub>3</sub> perovskite quantum dots (BPQDs) | <i>E. coli</i>                                                                                    | >4.5 h                           | -                          | 1.8                         | 5 min         | No                  | 6   |
| Aptamer-QDs-Teico-AuNPs                                           | <i>S. aureus</i>                                                                                  | 0.5 h                            | -                          | 1                           | 2 h           | No                  | 7   |
| MTPE-FCyP/LUM/ZIF@FL                                              | <i>E. coli</i>                                                                                    | >38 h                            | Yes                        | 1.74                        | 25 min        | No                  | 8   |
| aptamer-CQDs and GNP                                              | <i>S. aureus</i>                                                                                  | >26 h                            | Yes                        | 10                          | 90 min        |                     | 9   |
| PDANSs-FAM-Apt                                                    | <i>S. aureus</i>                                                                                  | >24.5 h                          | Yes                        | 1                           | 6 h           | No                  | 10  |
| CsWO <sub>3</sub> -FCD naNoHybrid                                 | <i>E. coli</i> and <i>S. aureus</i>                                                               | >71 h                            | Yes                        | 70 and<br>131               | >25 h         | No                  | 11  |
| CRISPR-Cas12a-Assisted MXene                                      | <i>S. aureus</i>                                                                                  | 45 min                           | Yes                        | 23                          | 2 h           | No                  | 12  |
| (Apt-MBs)-(FcMBL@AuNCs)                                           | MRSA and KPC-2 KP <sup>b</sup>                                                                    | >73 h                            | Yes                        | 20                          | 15 min        | Yes                 | 13  |
| Van-MBs@ <i>S. aureus</i> @biotin-pig IgG@SA@biotin-RCA           | <i>S. aureus</i>                                                                                  | >6h                              | Yes                        | 3.3×10 <sup>2</sup>         | 113 min       | Yes                 | 14  |
| Ab@SPM                                                            | <i>E. coli</i>                                                                                    | >12 h                            | Yes                        | 2                           | 55 min        | No                  | 15  |
| Fe <sub>3</sub> O <sub>4</sub> @aptamer                           | <i>Listeria monocytogenes</i>                                                                     | 11h                              | Yes                        | 1.0 × 10 <sup>2</sup>       | 20 min        | Yes                 | 16  |
| Zr-mMOF-p-Ab-Apt- F@UIO-66-NH <sub>2</sub> -p-LPS-Apt             | <i>A. baumannii</i>                                                                               | >12 h                            | Yes                        | 10                          | 2.5 h         | Yes                 | 17  |
| APBA-PEG-MNs                                                      | <i>S. aureus</i>                                                                                  | 6 h                              | Yes                        | 2.7 × 10 <sup>2</sup>       | 80 min        | Yes                 | 18  |
| Paper@epoxy@PEI-DFFPBA                                            | <i>S. aureus</i>                                                                                  | >88 h                            | Yes                        | 2.24 × 10 <sup>2</sup>      | 30 min        | Yes                 | 19  |

|                  |                                                                                                                                                     |          |     |                 |        |     |           |
|------------------|-----------------------------------------------------------------------------------------------------------------------------------------------------|----------|-----|-----------------|--------|-----|-----------|
| MNP-APTs@QDs-Abs | <i>Alicyclobacillus acidoterrestris</i>                                                                                                             | >21 h    | Yes | 10 <sup>3</sup> | 90 min | Yes | 20        |
| Eu <sup>3+</sup> | <i>S. aureus</i> , <i>E. coli</i> ,<br><i>Enterococcus faecalis</i> , <i>A. baumannii</i> ,<br><i>Bacillus cereus</i> , and<br><i>P. aeruginosa</i> | 2.25 min | No  | 10 <sup>4</sup> | ~1 h   | Yes | This work |

---

<sup>a</sup>Ab: antibody; Abs: antibody; APBA: 3-aminophenylboronic acid; Apt: aptamer; AuNC: gold nanocluster; AuNPs: gold nanoparticles; BCD: blue carbon dots; BSA: bovine serum albumin; CQDs: carbon quantum dots; CRISPR: clustered regularly interspaced short palindromic repeats; DFFPBA: 3,5-difluoro-4-formylphenylboronic acid; FAM: fluorophore 6-carboxyfluorescein-terminated *S. aureus*; FCD: fluorescent carbon dots; FcMBL: fragment crystallizable mannose binding lectin; FCyP: cyanostyryl-furan and pyridinium salt; FL: fluorescein; GNP: gold nanoparticles; GO: graphene oxide; LPS: lipopolysaccharide; LUM: lumiNol; MBs: magnetic beads; mMOF: magnetic based metal organic framework; MNP: magnetic nanoparticles; MNs: magnetic nanomaterials; MRSA: methicillin-resistant *Staphylococcus aureus*; MTPE: methoxy modified tetraphenylethylene; NCND: nitrogen-doped carbon nanodots; o-CD: ortho-phenylenediamines carbon dot); PDANSs: polydopamine nanospheres; PEG: polyethylene glycol; PEI: polyethyleneimine; QDs: quantum dots; RCA: rolling circle amplification; SA: streptavidin; SPM: superparamagnetic magnetic beads; Van: vancomycin; ZIF: zeolitic imidazolate framework. <sup>b</sup>KPC-2 KP: *Klebsiella pneumoniae* carbapenemase 2-expressing *Klebsiella pneumoniae*

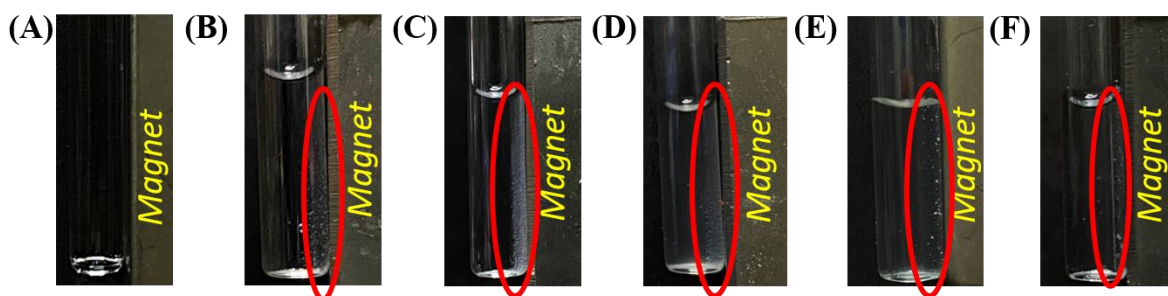

**Figure S1.** Examination of the magnetic  $\text{Eu}^{3+}$ -bacterium conjugates. Photographs of the (A) blank sample (0.39 mL) containing Tris buffer at pH 8 only and the bacterial samples (0.39 mL,  $0.2 \text{ mg mL}^{-1}$ ) including (B) *P. aeruginosa*, (C) *E. faecalis*, (D) *B. cereus*, (E) *E. coli* J96, and (F) *A. baumannii* prepared in Tris buffer (pH 8) obtained with the addition of  $\text{Eu}^{3+}$  (75 mM, 10  $\mu\text{L}$ ) followed by microwave-heating (power: 180 W) for 2.25 min and magnetic isolation by placing an external neodymium magnet ( $\sim 4000 \text{ G}$ ). The photographs were taken under room light. The red oval indicates the location of the magnetic  $\text{Eu}^{3+}$ -bacterium conjugates.

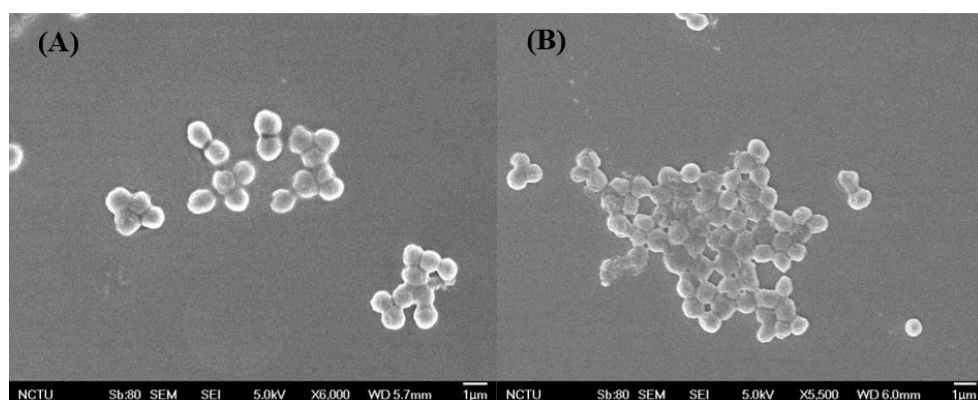

**Figure S2.** SEM images of *S. aureus* obtained (A) before and (B) after microwave-heating (power: 180 W) for 2.25 min.

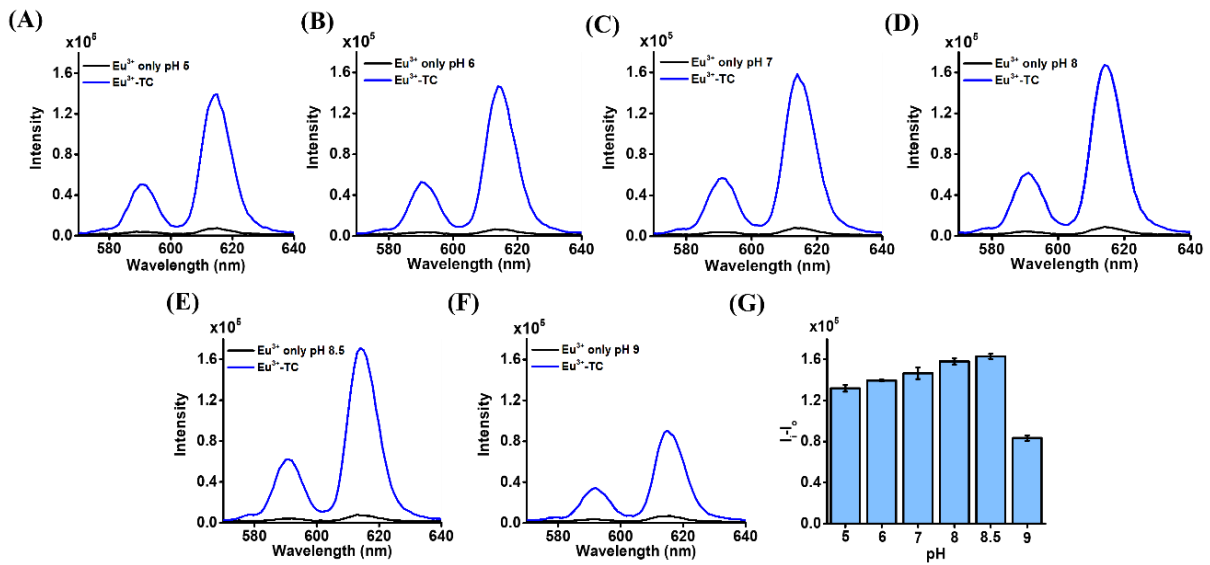

**Figure S3.** Examination of the optimal pH for enhancing fluorescence intensity derived from  $\text{Eu}^{3+}$  by TC. Representative fluorescence spectra ( $\lambda_{\text{ex}}=394\text{ nm}$ ) of the samples containing  $\text{Eu}^{3+}$  (2 mM) obtained without (black) and with (blue) adding TC (13  $\mu\text{M}$ ) at pH (A) 5, (B) 6, (C) 7, (D) 8, (E) 8.5, and (F) 9 after vortex-mixing for 1 h. Three replicates were conducted. (G) Bar graphs of the summarized results derived from Panels (A)-(F).  $I_1$  and  $I_0$  stand for the fluorescence intensity at 616 nm of the black and blue spectra, respectively.

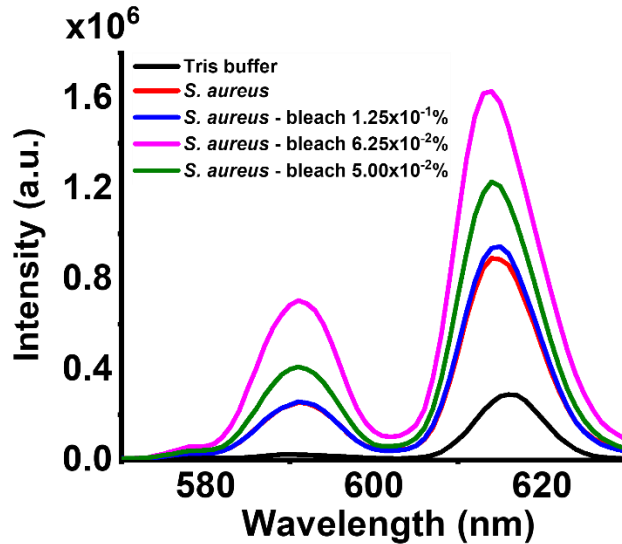

**Figure S4.** Optimization of the concentration of the added bleach. Fluorescence spectra ( $\lambda_{\text{ex}}=394\text{ nm}$ ) of the samples containing *S. aureus* (0.02  $\text{mg mL}^{-1}$ , 0.39 mL) obtained by using  $\text{Eu}^{3+}$  (75 mM, 10  $\mu\text{L}$ ) as the trapping probe followed by magnetic isolation and the addition of bleach with different concentrations under microwave-heating (power: 180 W, 1.75 min) and added with TC (30  $\mu\text{M}$ , 30  $\mu\text{L}$ ) incubated under microwave-heating (power: 180 W, 1.75 min).

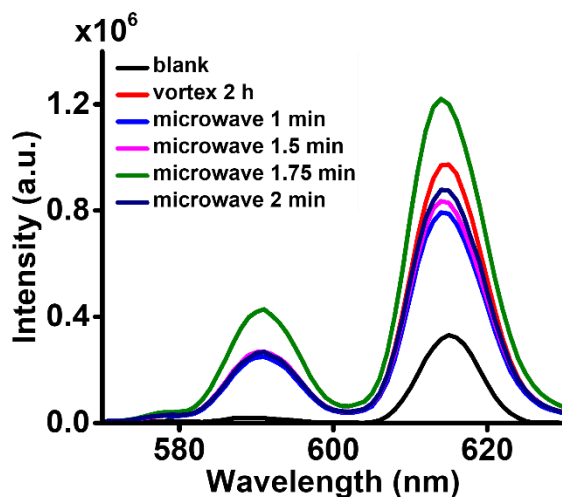

**Figure S5.** Examination of incubation conditions. Fluorescence spectra ( $\lambda_{\text{ex}} = 394 \text{ nm}$ ) of the samples ( $0.39 \text{ mL}$ ) containing *S. aureus* ( $0.02 \text{ mg mL}^{-1}$ ) obtained after trapped by  $\text{Eu}^{3+}$  ( $75 \text{ mM}$ ,  $10 \mu\text{L}$ ) followed by bleach treatment ( $6.25 \times 10^{-2} \%$ ) and the addition of TC ( $30 \mu\text{M}$ ,  $30 \mu\text{L}$ ) under different incubation conditions.

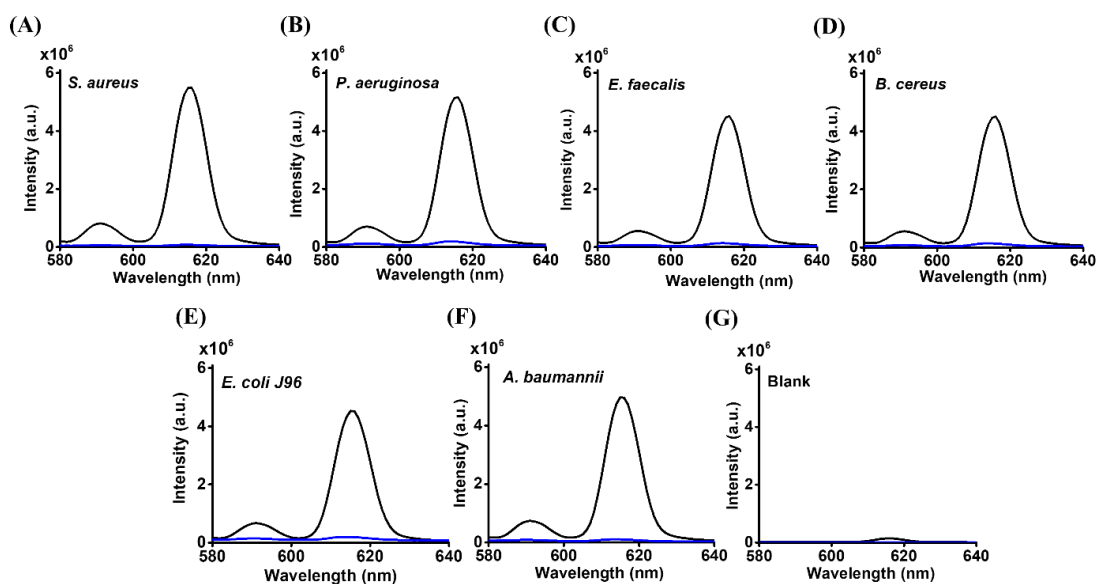

**Figure S6.** Examination of different model bacteria. Fluorescence spectra of the bacterial samples including (A) *S. aureus*, (B) *P. aeruginosa*, (C) *E. faecalis*, (D) *B. cereus*, (E) *E. coli* J96, (F) *A. baumannii*, and (G) blank obtained before (blue) and after (black) bleach treatment and the addition of TC. The concentrations of all the bacteria in the samples were  $0.2 \text{ mg mL}^{-1}$ . All the samples ( $0.39 \text{ mL}$ ) were added with  $\text{Eu}^{3+}$  ( $75 \text{ mM}$ ,  $10 \mu\text{L}$ ) followed by microwave-heating (power:  $180 \text{ W}$ ) for  $2.25 \text{ min}$  and magnetic isolation by placing an external neodymium magnet ( $\sim 4000 \text{ G}$ ) followed by rinse steps. Bleach ( $0.25 \%$ ,  $10 \mu\text{L}$ ) was added to the individual samples with the final concentration of  $6 \times 10^{-3} \%$  and incubated under microwave-heating (power:  $180 \text{ W}$ ) for  $1.75 \text{ min}$ . TC ( $30 \mu\text{M}$ ,  $30 \mu\text{L}$ ) was added to the individual samples and incubated under microwave-heating (power:  $180 \text{ W}$ ) for  $1.75 \text{ min}$  in the water bath of  $2 \text{ mL}$ .



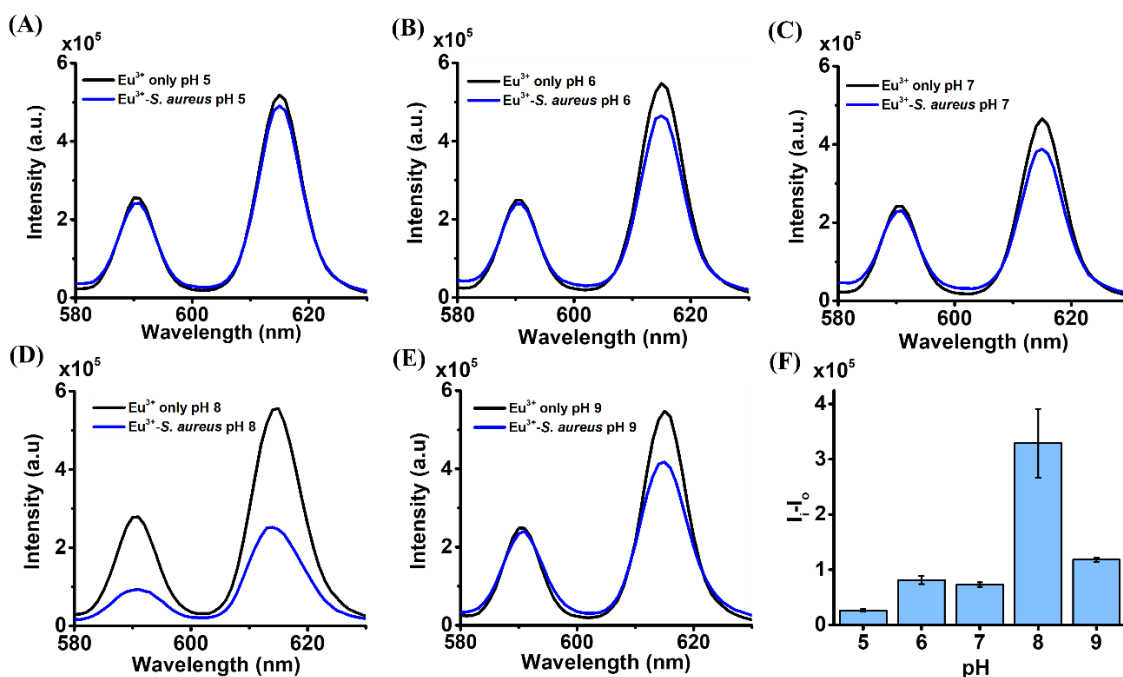

**Figure S7.** Examination of the optimal binding pH of  $\text{Eu}^{3+}$  toward *S. aureus*. Representative fluorescence spectra ( $\lambda_{\text{ex}} = 394 \text{ nm}$ ) of the supernatants derived from the samples (0.39 mL) containing  $\text{Eu}^{3+}$  (10 mM) obtained before and after incubated with *S. aureus* ( $0.2 \text{ mg mL}^{-1}$ ) at pH (A) 5, (B) 6, (C) 7, (D) 8, and (E) 9 followed by centrifugation (3000 rpm, 5 min). Three replicates were conducted for different pH conditions. (F) Bar graphs of the summarized results of Panels (A)-(E) obtained from different pH values ( $n = 3$ ) in terms of binding capacity of  $\text{Eu}^{3+}$  onto *S. aureus*.  $I_1$  and  $I_0$  stand for the fluorescence intensity at 616 nm of the black and blue spectra, respectively.

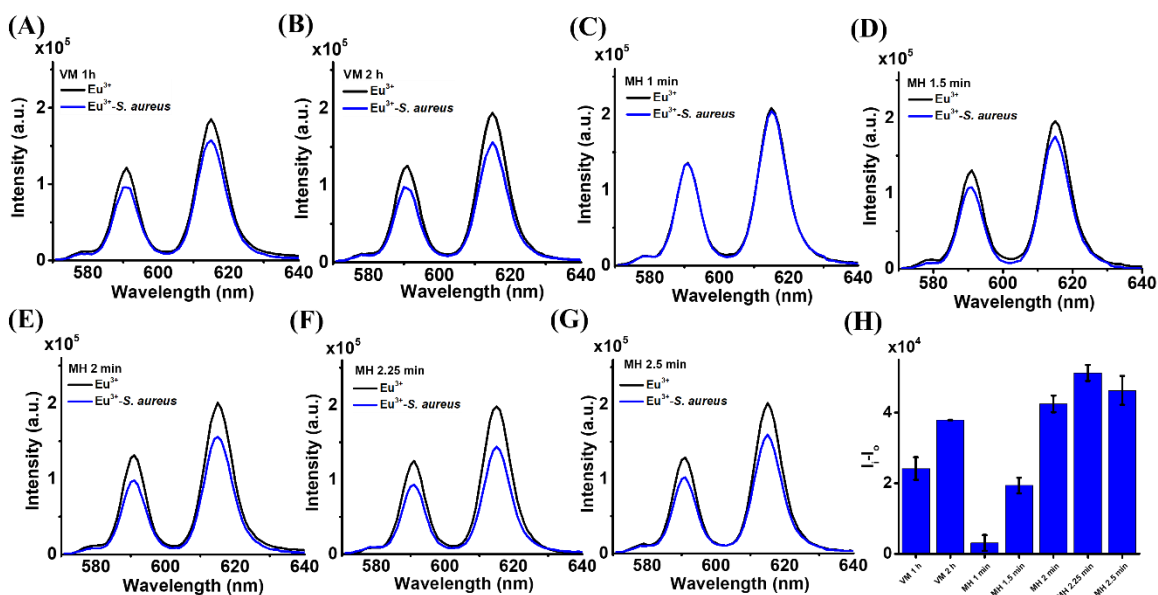

**Figure S8.** Examination of the optimal incubation parameters. Representative fluorescence spectra ( $\lambda_{\text{ex}} = 394 \text{ nm}$ ) of supernatants of the samples (0.39 mL) containing  $\text{Eu}^{3+}$  (2 mM) obtained without (black) and with (blue) incubated with *S. aureus* ( $0.2 \text{ mg mL}^{-1}$ ) under vortex-mixing (VM) for (A) 1 h, (B) 2 h, and microwave-heating (MH) (power: 180 W) for (C) 1 (D) 1.5, (E) 2, (F) 2.25, and (G) 2.5 min followed by magnetic isolation. Three replicates were conducted. (H) Bar graphs of the summarized results derived from Panels (A)-(G).  $I_i$  and  $I_o$  stand for the fluorescence intensity at 616 nm derived from the black and blue spectra, respectively.

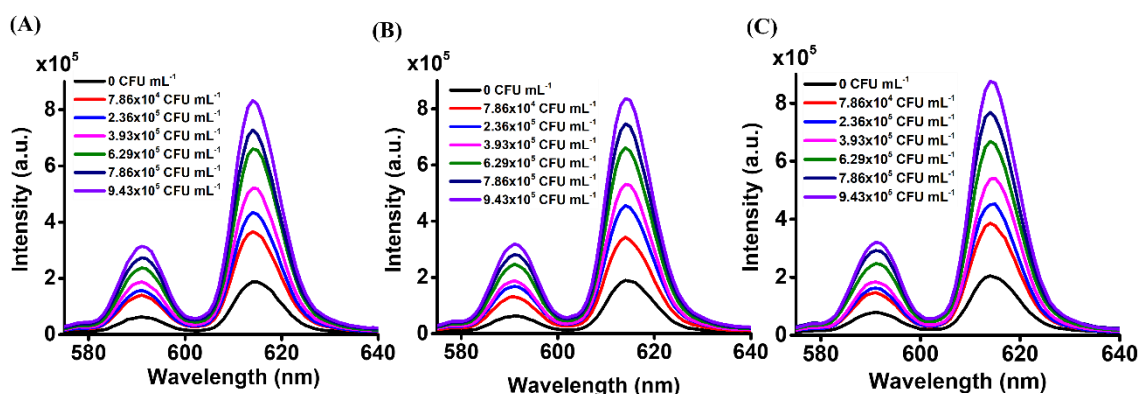

**Figure S9.** Quantitative analysis. Fluorescence spectra ( $\lambda_{\text{ex}} = 394 \text{ nm}$ ) of the samples (0.39 mL) containing *S. aureus* with different concentrations obtained by using  $\text{Eu}^{3+}$  (75 mM,  $10 \mu\text{L}$ ) as the trapping probe followed by rinse, bleach treatment (0.0625 %), and the addition of TC ( $30 \mu\text{M}$ ,  $30 \mu\text{L}$ ). Three replicates (A)-(C) were conducted. *S. aureus* with the concentration of  $1 \text{ mg mL}^{-1}$  is equal to  $\sim 7.86 \times 10^9 \text{ CFU mL}^{-1}$ .

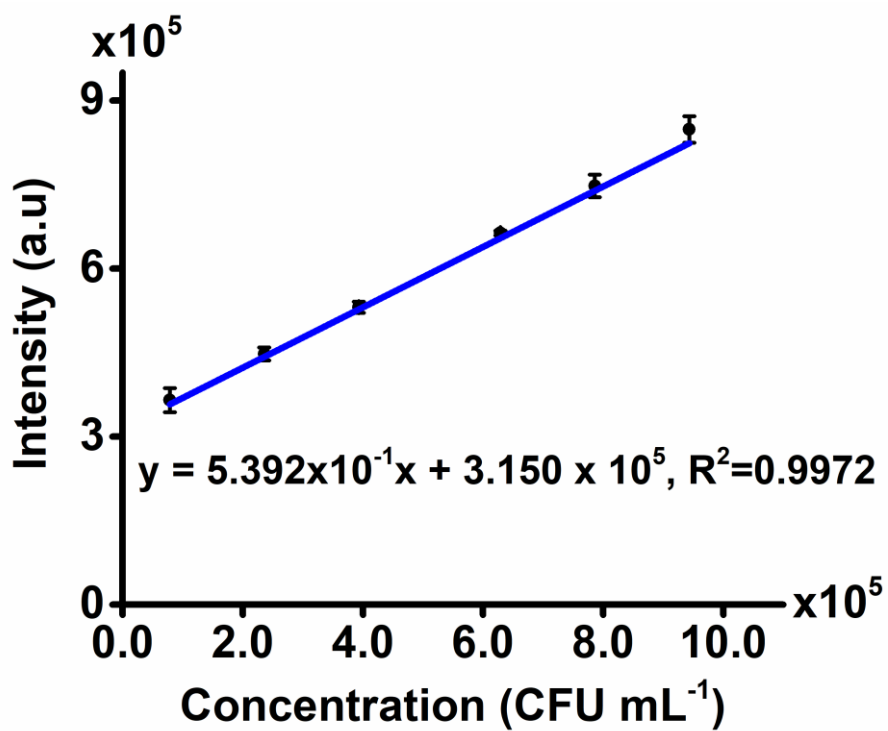

**Figure S10.** Calibration curve obtained by plotting the fluorescence intensity at the wavelength of 616 nm of the fluorescence spectra shown in Figure S9 versus the concentration of *S. aureus*.

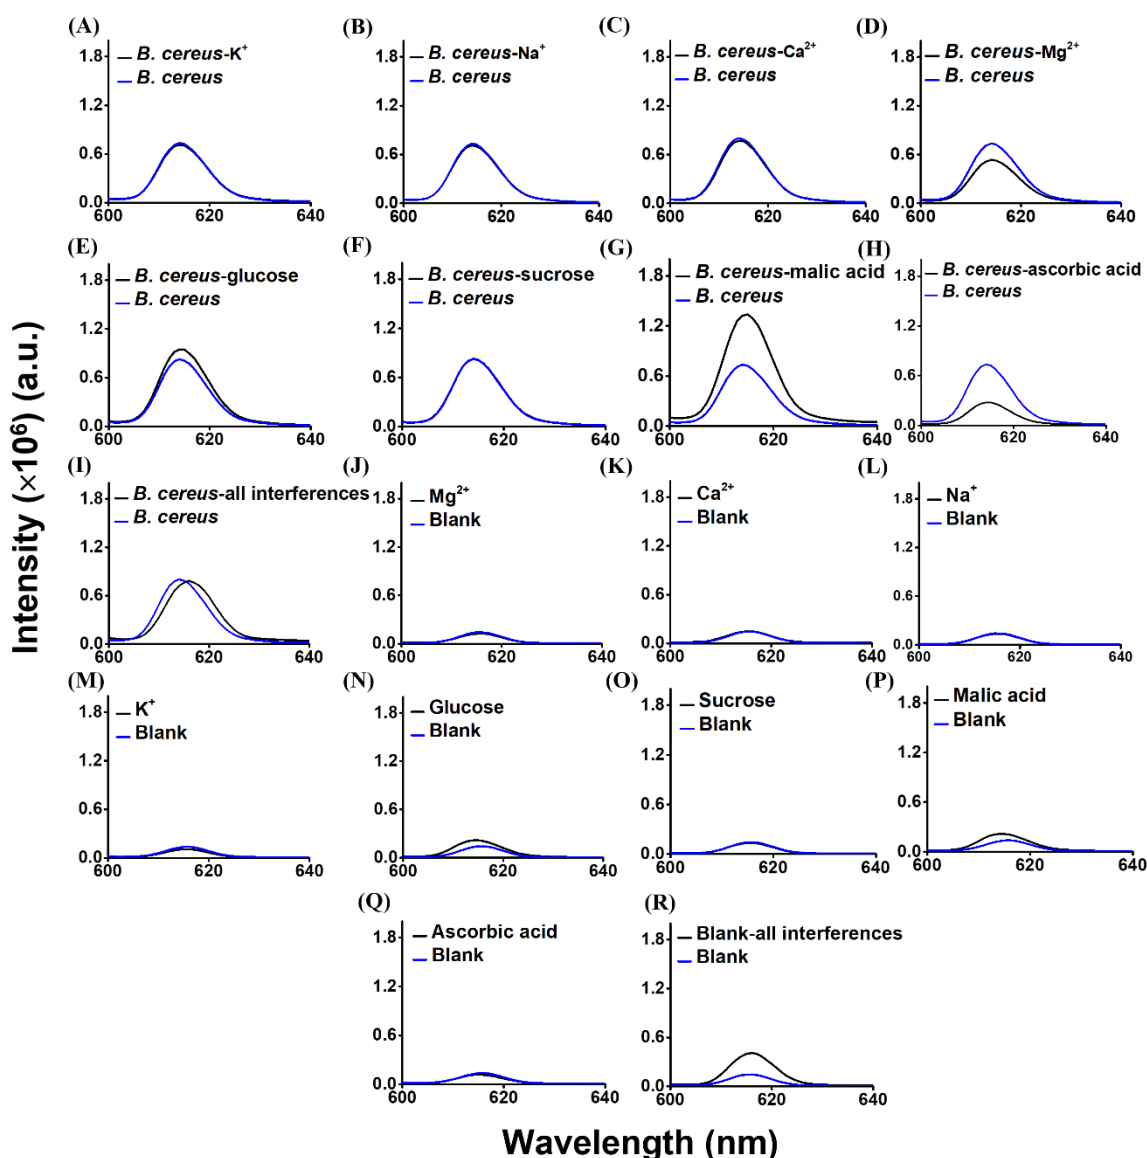

**Figure S11.** Fluorescence spectra ( $\lambda_{\text{ex}}=394\text{ nm}$ ) of (A) of the sample ( $390\ \mu\text{L}$ ) containing *B. cereus* ( $2\ \mu\text{g mL}^{-1}$ ) in the absence (blue) and presence (black) of the interference species including (A)  $\text{Mg}^{2+}$  ( $0.10\ \text{mg mL}^{-1}$ ,  $390\ \mu\text{L}$ ), (B)  $\text{Ca}^{2+}$  ( $0.16\ \text{mg mL}^{-1}$ ,  $390\ \mu\text{L}$ ), (C)  $\text{Na}^{+}$  ( $0.08\ \text{mg mL}^{-1}$ ,  $390\ \mu\text{L}$ ), (D)  $\text{K}^{+}$  ( $2.02\ \text{mg mL}^{-1}$ ,  $390\ \mu\text{L}$ ), (E) glucose ( $52.60\ \text{mg mL}^{-1}$ ,  $390\ \mu\text{L}$ ), (F) sucrose ( $25.20\ \text{mg mL}^{-1}$ ,  $390\ \mu\text{L}$ ), (G) malic acid ( $0.90\ \text{mg mL}^{-1}$ ,  $390\ \mu\text{L}$ ), and (H) ascorbic acid ( $0.02\ \text{mg mL}^{-1}$ ,  $390\ \mu\text{L}$ ) (I) all interferences obtained after using our trapping and sensing method. Fluorescence spectra of the Tris buffer ( $10\ \text{mM}$ ,  $\text{pH } 8$ ) without (blue) and with (black) the addition of the interference species including (J)  $\text{Mg}^{2+}$  ( $0.10\ \text{mg mL}^{-1}$ ,  $390\ \mu\text{L}$ ), (K)  $\text{Ca}^{2+}$  ( $0.16\ \text{mg mL}^{-1}$ ,  $390\ \mu\text{L}$ ), (L)  $\text{Na}^{+}$  ( $0.08\ \text{mg mL}^{-1}$ ,  $390\ \mu\text{L}$ ), (M)  $\text{K}^{+}$  ( $2.02\ \text{mg mL}^{-1}$ ,  $390\ \mu\text{L}$ ), (N) glucose ( $52.6\ \text{mg mL}^{-1}$ ,  $390\ \mu\text{L}$ ), (O) sucrose ( $25.2\ \text{mg mL}^{-1}$ ,  $390\ \mu\text{L}$ ), (P) malic acid ( $0.90\ \text{mg mL}^{-1}$ ,  $390\ \mu\text{L}$ ), (Q) ascorbic acid ( $0.02\ \text{mg mL}^{-1}$ ,  $390\ \mu\text{L}$ ), and (R) all interferences above obtained after using our method.

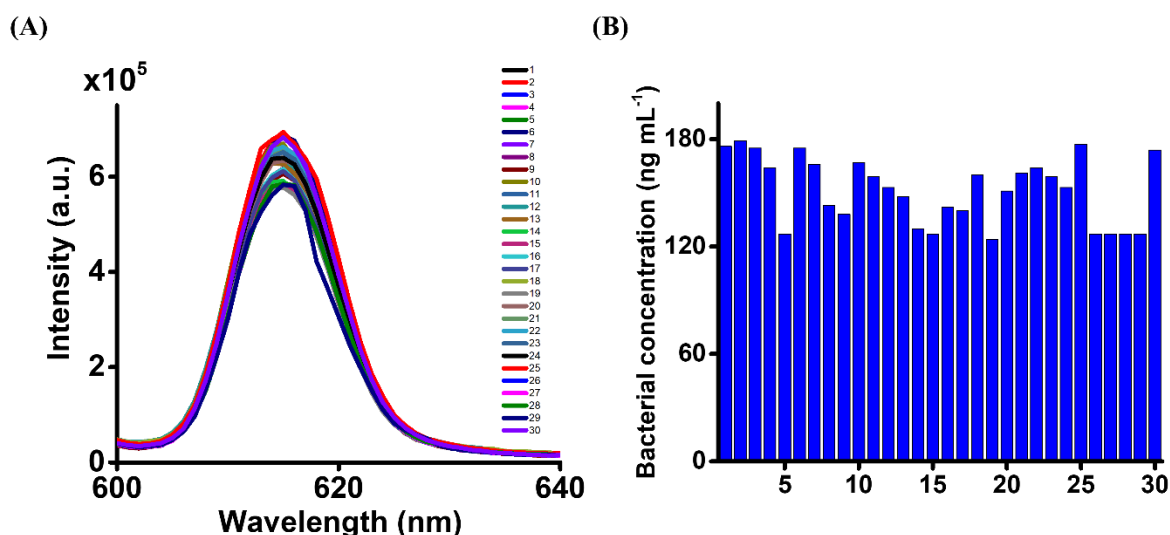

**Figure S12.** (A) Examination of precision and accuracy. (B) Fluorescence spectra of the sample containing *S. aureus* (150 ng mL<sup>-1</sup>) obtained after treated by our developed method for 30 runs (6 runs per day for 5 days).

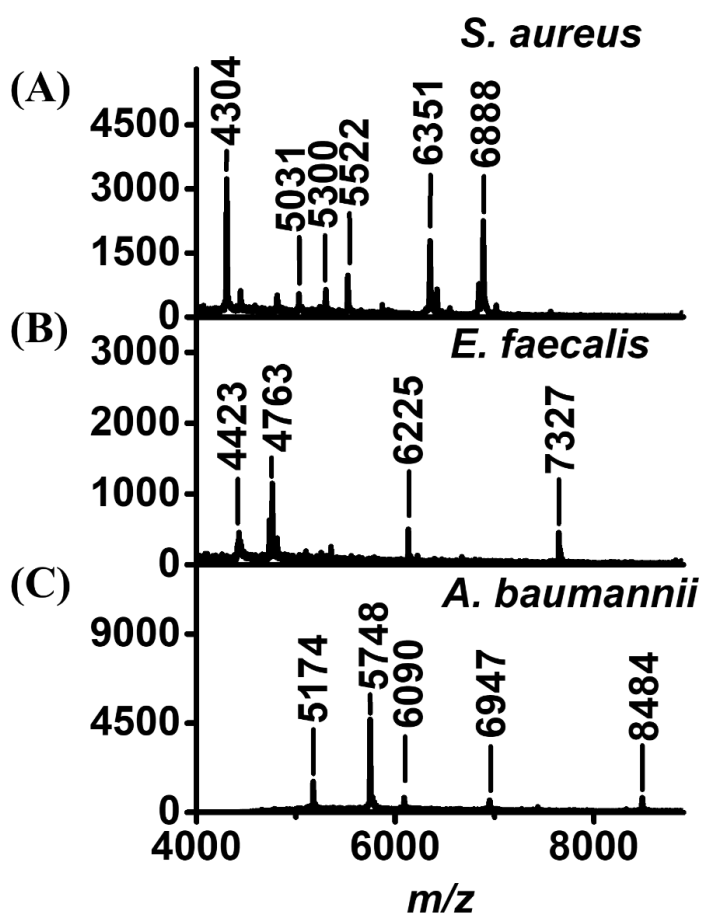

**Figure S13.** MALDI mass spectra of the samples (0.1 mg mL<sup>-1</sup>) including (A) *S. aureus*, (B) *E. faecalis*, and (C) *A. baumannii*. CHCA (20 mg mL<sup>-1</sup>) prepared in the solvent containing acetonitrile and 3% trifluoroacetic acid (2:1, v/v) was used as the MALDI matrix.

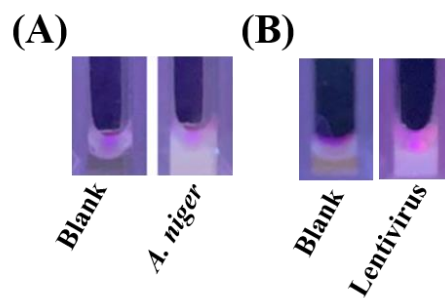

**Figure S14.** Examination of our method for sensing of other microorganisms including the samples (0.39 mL) containing (A) *A. niger* spores ( $OD_{600} = 0.2$ ) and (B) lentiviruses ( $\sim 5 \times 10^7$  RIU  $mL^{-1}$ ).

**Supporting Information time-lapse Video 1.** Time-lapse video showing the monitoring of a Tris buffer (0.39 mL, pH 8) with the addition of  $\text{Eu}^{3+}$  (75 mM, 10  $\mu\text{L}$ ). The resulting solution was incubated in a microwave oven (power: 180 W) for 2.25 min before magnetic isolation with an external neodymium magnet (~4000 G) placed nearby.

**Supporting Information time-lapse Video 2.** Time-lapse video showing the monitoring of a sample solution (0.39 mL) containing *S. aureus* (0.5 mg  $\text{mL}^{-1}$ ) prepared in Tris buffer (pH 8), with the addition of  $\text{Eu}^{3+}$  (75 mM, 10  $\mu\text{L}$ ). The sample was incubated in a microwave oven (power: 180 W) for 2.25 min before magnetic isolation with an external neodymium magnet (~4000 G) placed next to the sample tube.

## References

1. Feng, Q.; Xu, H.; Li, Z.; Chen, C.; Miao, X. *Sens. Actuators B Chem.* **2022**, *372*, 132598.
2. Shen, Y.; Wu, T.; Zhang, Y.; Ling, N.; Zheng, L.; Zhang, S.-L.; Sun, Y.; Wang, X.; Ye, Y. *Anal. Chem.* **2020**, *92*, 13396–13404.
3. Bahari, D.; Babamiri, B.; Salimi, A.; Salimizand, H. *Talanta.* **2021**, *221*, 121619.
4. Li, J.; Fang, Y.; Lin, X.; Hao, Z.; Yin, Y.; Zhao, M.; Liu, Y. *ACS Appl. Bio Mater.* **2021**, *4*, 6361–6370.
5. Fu, L.; Chen, Q.; Jia, L. *Food Chem.* **2022**, *374*, 131750.
6. Balakrishna, R. G. *Sens. Actuators B Chem.* **2023**, *397*, 134626.
7. Fu, F.; Zhang, Y.; Li, L.; Wang, H.; Li, Q.; Tao, X.; Song, Y.; Song, E. *Anal. Chem.* **2020**, *92*, 11462-11468.
8. Wu, H.; Fang, Y.; Tian, L.; Liu, X.; Zhou, X.; Chen, X.; Gao, H.; Qin, H.; Liu, Y. *ACS Sens.* **2023**, *8*, 3205–3214.
9. Pebdeni, A. B.; Hosseini, M.; Ganjali, M. R. *Food Anal. Methods.* **2020**, *13*, 2070-2079.
10. Ye, Y.; Zheng, L.; Wu, T.; Ding, X.; Chen, F.; Yuan, Y.; Fan, G.-C.; Shen, Y. *ACS Appl. Mater. Interfaces.* **2020**, *12* (31), 35626-35637.
11. Robby, A. I.; Kim, S. G.; Lee, U. H.; In, I.; Lee, G.; Park, S. Y. *Chem. Eng. J.* **2021**, *403*, 126351.
12. Sheng, A.; Wang, P.; Yang, J.; Tang, L.; Chen, F.; Zhang, J. *Anal. Chem.* **2021**, *93*, 4676-4681.
13. Sun, J.; Zhang, L.; Xu, Y.; Xue, Y.; Qiao, L.; Ding, C.; Ling, L.; Yu, S. *Sens. Actuators B Chem.* **2021**, *349*, 130762.
14. Wang, Y.; Wang, Z.; Zhan, Z.; Liu, J.; Deng, T.; Xu, H. *Anal. Chim. Acta.* **2022**, *1189*, 339213.
15. Rodoplu, D.; Chang, C.-S.; Kao, C.-Y.; Hsu, C.-H. *Talanta.* **2021**, *230*, 122291.



16. Du, J.; Liu, J.; Liu, K.; Zhao, D.; Sagratini, G.; Tao, J.; Bai, Y. *Anal. Methods*. **2022**, *14*, 2188-2194.
17. Yang, S.; Guo, Y.; Fan, J.; Yang, Y.; Zuo, C.; Bai, S.; Sheng, S.; Li, J.; Xie, G. *Mikrochim. Acta*. **2020**, *187*, 1-10.
18. Wang, Z.; Feng, X.; Xiao, F.; Bai, X.; Xu, Q.; Xu, H. *Microchem. J.* **2022**, *178*, 107379.
19. Xu, Y.; Zheng, H.; Sui, J.; Lin, H.; Cao, L. *Foods*. **2023**, *12* (7), 1366.
20. Tian, Y.; Li, X.; Cai, R.; Yang, K.; Gao, Z.; Yuan, Y.; Yue, T.; Wang, Z. *Food Control*. **2021**, *126*, 108060.
